# Supplementary material
Source: PubMed Central journal article supplement (PMC5472353)
Supplement: NIHMS862367-supplement.pdf [file NIHMS862367-supplement.pdf]

Supplemental Figure 2. Related to Figure 5 and 6.  
Identification of the products generated by the reaction of  
hexachloroplatinate(IV) with DMSO and their capacity to bind  
cyanide anions

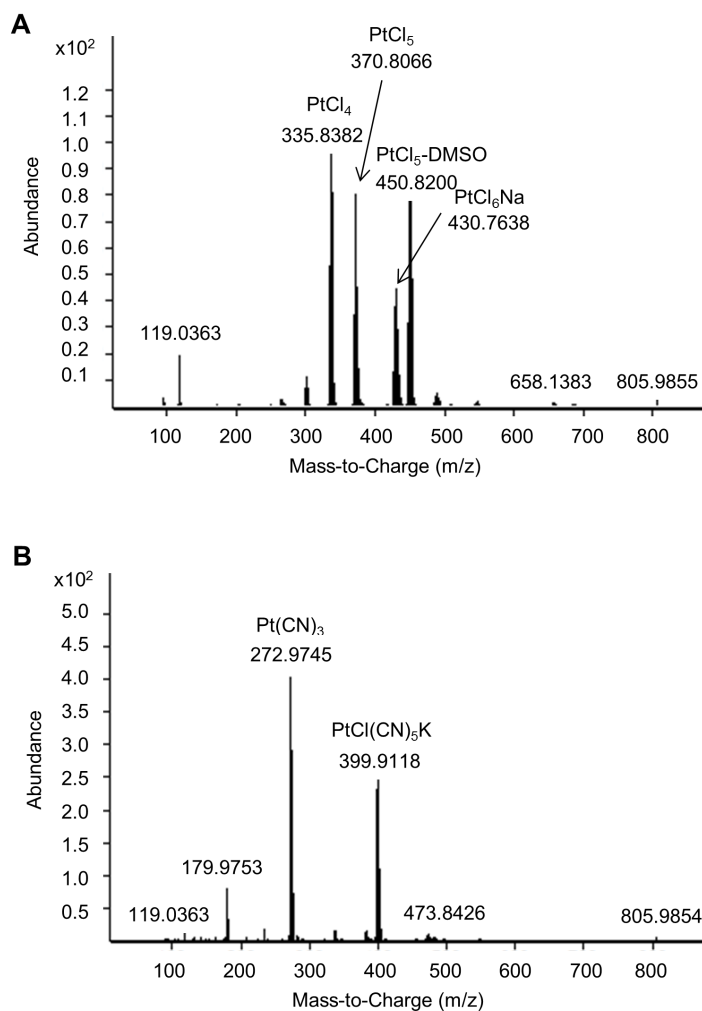

**Figure S2 Related to Figure 5 and 6. Identification of the products generated by the reaction of hexachloroplatinate(IV) with DMSO and their capacity to bind cyanide anions.** A) To decipher the chemical species created when hexachloroplatinate(IV) is dissolved in DMSO, we used ESI-MS. DMSO undergoes nucleophilic attack of the platinum atom, displacing one chloride ligand and generating PtCl<sub>5</sub>-DMSO (m/z = 450). An ion signal detected at m/z = 430 corresponds to the starting material (PtCl<sub>6</sub>Na). B) When cyanide is added to hexachloroplatinate(IV) that has been dissolved in DMSO the most abundant ion signals detected were at m/z = 272 and 399 corresponding to the platinum atom bound to 3 or 5 cyanide anions.

## Supplemental Tables

Table S1. Related to Figure 1. Identification of the products generated from the reaction between cyanide and cisplatin (DMSO) using isotope distribution comparison of K<sup>12</sup>C<sup>14</sup>N versus K<sup>13</sup>C<sup>15</sup>N

| Species                    | Peak in K <sup>12</sup> C <sup>14</sup> N | Peak in K <sup>13</sup> C <sup>15</sup> N | Mass Difference |
|----------------------------|-------------------------------------------|-------------------------------------------|-----------------|
| [Pt(CN) <sub>4</sub> ]     | 337.9                                     | 345.9                                     | 8               |
| [Pt(CN) <sub>3</sub> ]     | 272.9                                     | 278.9                                     | 6               |
| [Pt(CN) <sub>3</sub> DMSO] | 350.9                                     | 356.9                                     | 6               |

Table S2. Related to Figure 3. Peaks observed for ESI+ mass spectra of cisplatin dissolved in DMSO

| Species                                                           | Formula                                                                                                     | Observed Mass | Calculated Mass |
|-------------------------------------------------------------------|-------------------------------------------------------------------------------------------------------------|---------------|-----------------|
| [Pt(NH <sub>3</sub> ) <sub>2</sub> (Cl)(DMSO)]+                   | C <sub>2</sub> H <sub>12</sub> ClN <sub>2</sub> OPtS                                                        | 342.9996      | 343.0085        |
| [Pt(NH <sub>3</sub> )(Cl)(DMSO) <sub>2</sub> ]+                   | C <sub>4</sub> H <sub>15</sub> ClNO <sub>2</sub> PtS <sub>2</sub>                                           | 403.9868      | 403.9959        |
| μNH <sub>2</sub> -[Pt(NH <sub>3</sub> )(Cl)(DMSO)] <sub>2</sub> + | C <sub>4</sub> H <sub>20</sub> Cl <sub>2</sub> N <sub>3</sub> O <sub>2</sub> Pt <sub>2</sub> S <sub>2</sub> | 665.9661      | 665.9670        |
